# Supplementary material
Source: PubMed Central journal article supplement (PMC7988498)

A

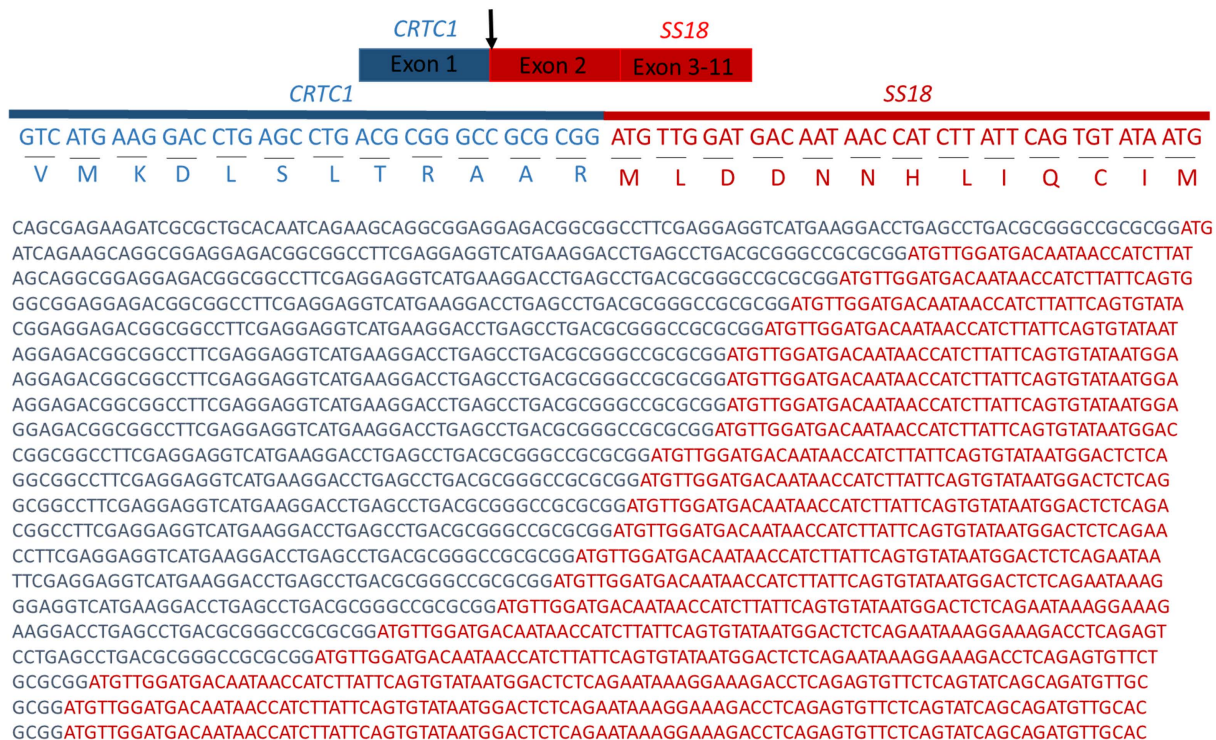

B

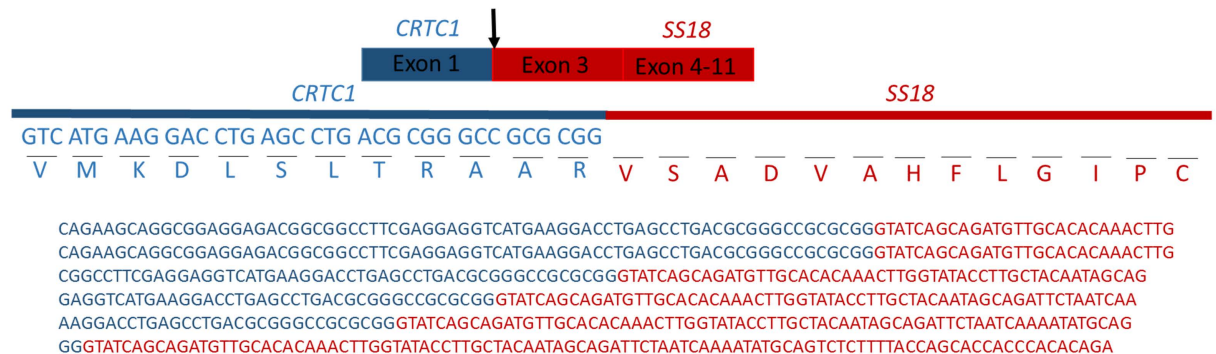

**Figure S2****A**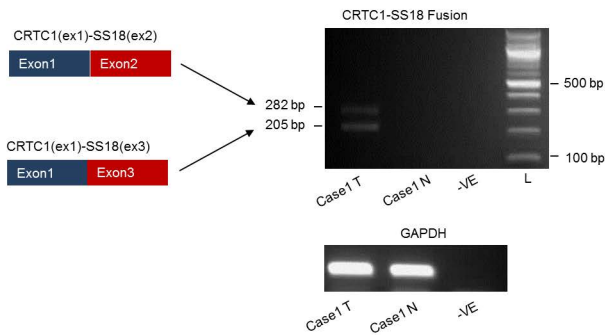**B**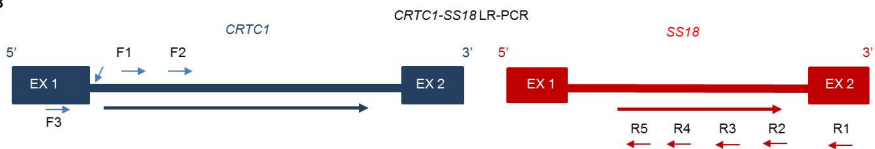**C**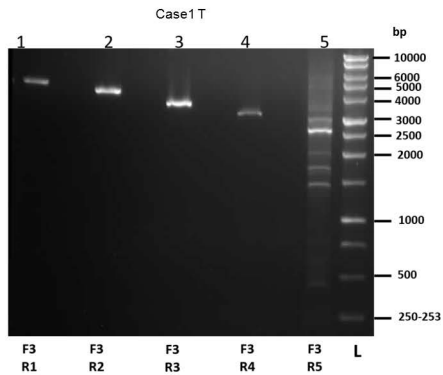**D**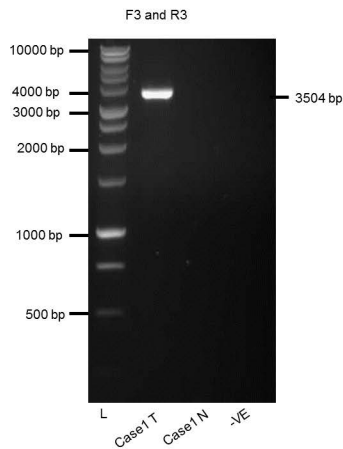

**Figure S3**

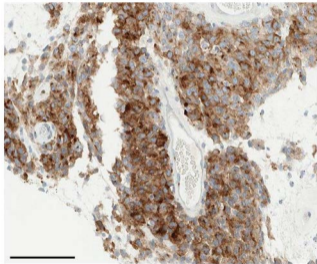

**Figure S4**

Empty Vector  
CRTC1-SS18 Clone1  
CRTC1-SS18 Clone 3

Anti-FLAG

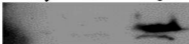

$\alpha$ -Tubulin

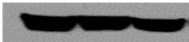

Supplement: NIHMS1635970-supplement-sup_FigS1-S4.pdf [file NIHMS1635970-supplement-sup_FigS1-S4.pdf]
